# Supplementary figures and images for: Patient and clinician perceptions of the trauma and acute care surgery hospitalization discharge transition of care: a qualitative study
Source: HighWire-hosted journal article supplement (doi:10.1136/tsaco-2021-000800), 2022-01-01

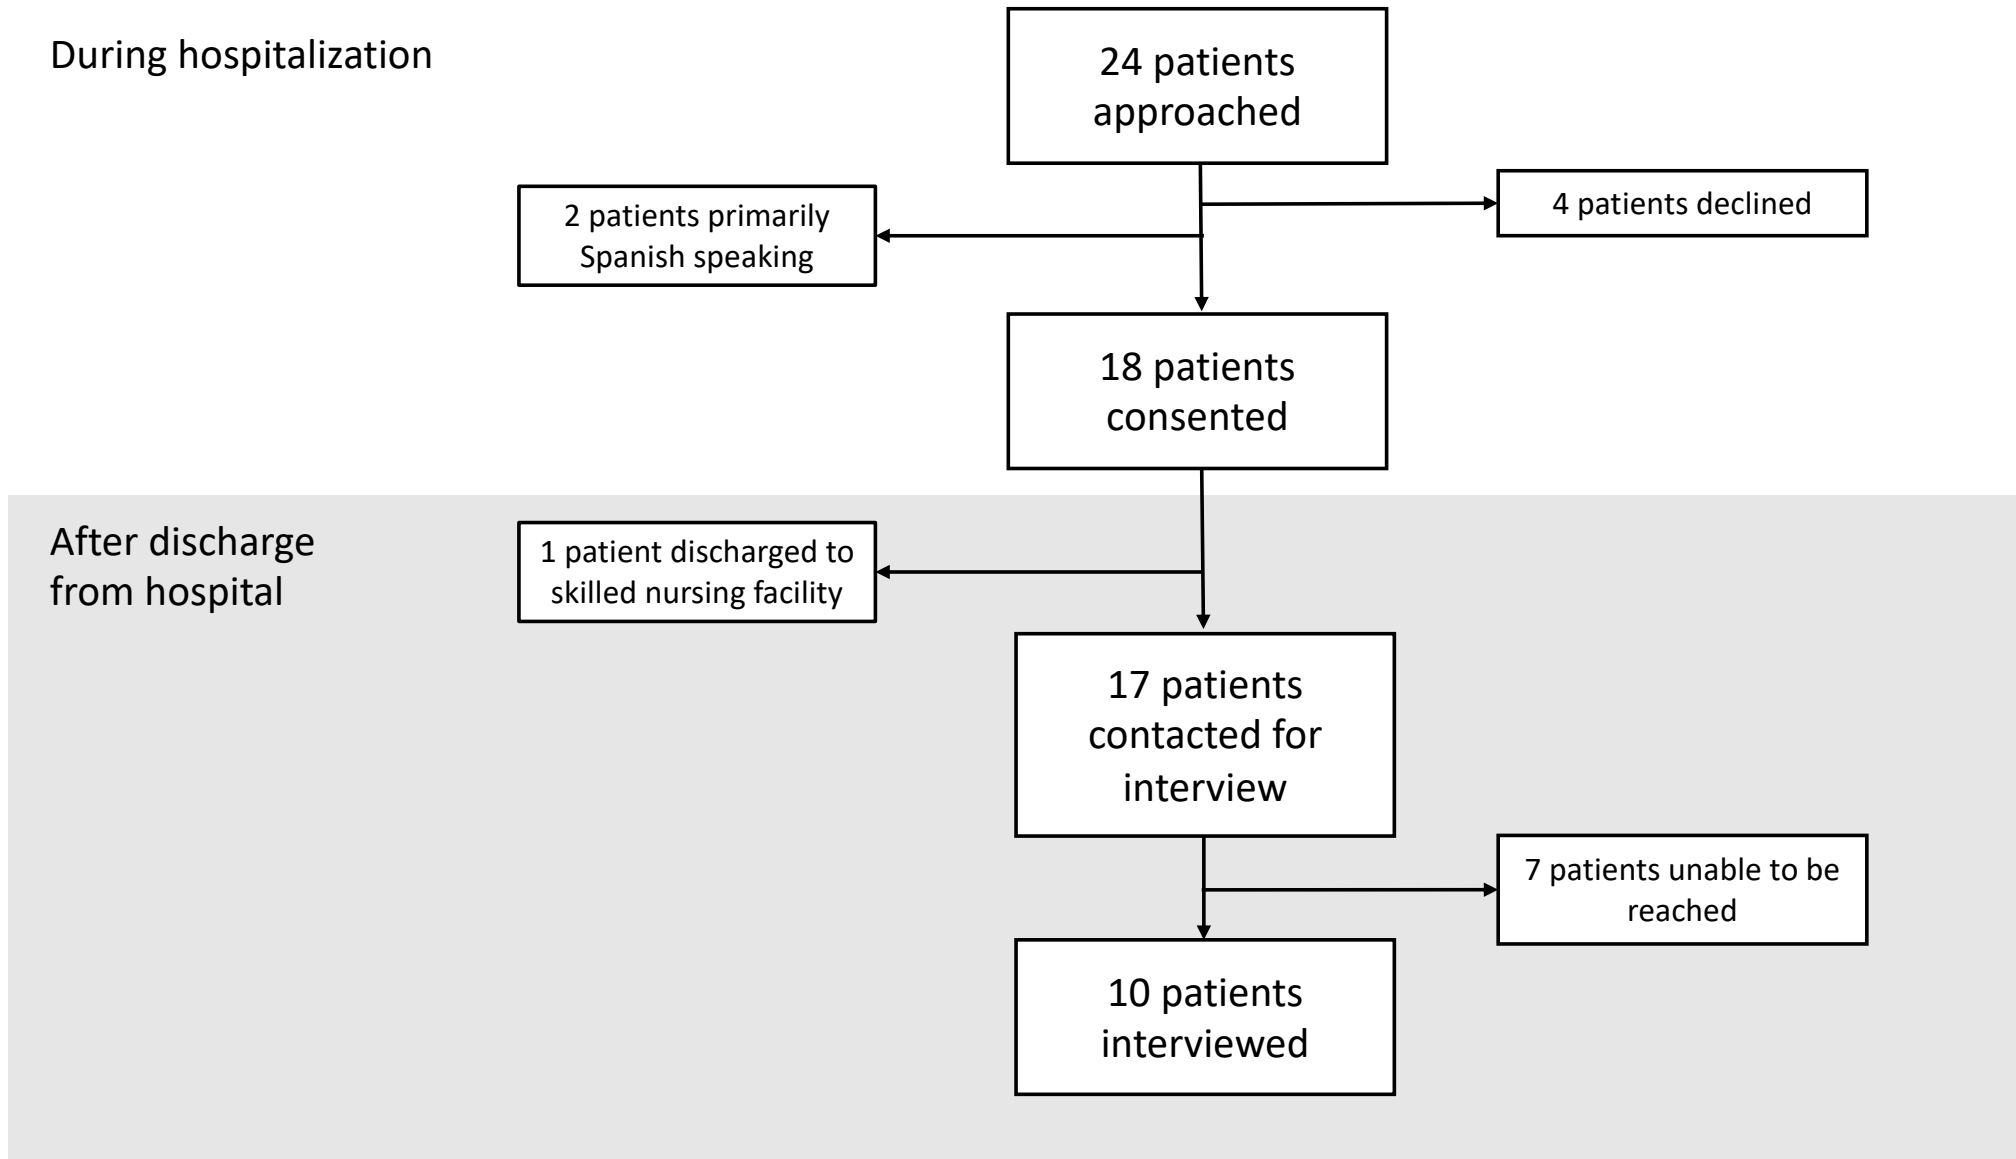

Supplement: tsaco-2021-000800supp001_data_supplement.pdf [file tsaco-2021-000800supp001_data_supplement.pdf]
